# Supplementary material
Source: Springer Nature journal article supplement (https://www.springermedizin.de/resource/supplementary/12889_2012_5474_MOESM1_ESM.pdf/9495106)
Supplement: MOESM1 [file 9495106]

Table 4: Odds ratios and 95% Confidence intervals for regression of mammography awareness on selected variables

| Variable                                                           | Odds ratio | 95% CI OR    | P value |
|--------------------------------------------------------------------|------------|--------------|---------|
| Age(years)                                                         |            |              |         |
| Less than 40                                                       | 3.01       | 0.24 – 38.34 | 0.396   |
| 40-59                                                              | 1.78       | 0.14 – 22.07 | 0.653   |
| 60+ (ref)*                                                         | 1          |              |         |
| Education                                                          |            |              |         |
| None                                                               | 0.55       | 0.09 – 3.32  | 0.518   |
| Primary or Secondary                                               | 0.30       | 0.12 – 0.73  | 0.008*  |
| Tertiary(ref)                                                      | 1          |              |         |
| Parity                                                             |            |              |         |
| None                                                               | 3.97       | 0.42 – 37.44 | 0.228   |
| 1-4                                                                | 8.77       | 1.04 – 73.65 | 0.046*  |
| 5+(ref)                                                            | 1          |              |         |
| Had discussions about breast cancer with other women               |            |              |         |
| Yes                                                                | 1.32       | 0.61 – 2.85  | 0.480   |
| No(ref)                                                            | 1          |              |         |
| Heard or seen anything about breast cancer prevention in community |            |              |         |
| Yes                                                                | 3.41       | 1.39 – 8.36  | 0.007*  |
| No(ref)                                                            | 1          |              |         |
| Self perceived Chances of having breast cancer                     |            |              |         |
| Likely                                                             | 8.34       | 0.76 – 91.69 | 0.083   |
| Unlikely/God Forbid                                                | 0.89       | 0.10 – 8.05  | 0.914   |

|                                                 |       |              |        |
|-------------------------------------------------|-------|--------------|--------|
| Don't know(ref)                                 | 1     |              |        |
| Know one or more symptoms of breast cancer      |       |              |        |
| Yes                                             | 1.27  | 0.56 -2.86   | 0.566  |
| No(ref)                                         | 1     |              |        |
| Know one or more risk factors for breast cancer |       |              |        |
| Yes                                             | 14.93 | 1.90 -111.11 | 0.010* |
| No(ref)                                         | 1     |              |        |
| Had Clinical breast exam                        |       |              |        |
| Yes                                             | 2.34  | 1.10 – 4.96  | 0.027* |
| No(ref)                                         | 1     |              |        |
| Practised self breast examination               |       |              |        |
| Yes                                             | 0.98  | 0.43 -2.22   | 0.953  |
| No(ref)                                         |       |              |        |
| Source of information about breast cancer       |       |              |        |
| Newspaper/magazine                              | 0.81  | 0.16 – 4.11  | 0.802  |
| Radio/television                                | 0.31  | 0.06 – 1.55  | 0.151  |
| Friends/Colleagues                              | 1.28  | 0.28 – 5.78  | 0.747  |
| Hospital                                        | 0.44  | 0.08 – 2.46  | 0.351  |
| Others                                          | 2.03  | 0.48 – 8.62  | 0.338  |
| Never heard about cancer recently(ref)          | 1     |              |        |

\*ref indicates reference category
